# Supplementary material
Source: MDPI journal article supplement (https://www.mdpi.com/2073-4352/12/5/610)
Supplement: s1 [file s1 › crystals-1660981-supplementary.pdf]

# **Hydrogen Bonds in Precursor Solution: The Origin of the Anomalous $J$ - $V$ Curves in Perovskite Solar Cells from Gas-quenching Process**

Yanfang Chu, Lei Zhao, Hongmei Zhao, Yuchen Sun, Rui Zhang, Song Li, Junjie He<sup>\*</sup>, Jing Li<sup>\*</sup>

Lin Zhang<sup>1</sup>, Lin Yao<sup>1</sup>, Yanfang Chu<sup>2</sup>, Lei Zhao<sup>3</sup>, Hongmei Zhao<sup>3</sup>, Yuchen Sun<sup>1</sup>, Jing Li<sup>2,4,\*</sup>, Junjie He<sup>1,2,\*</sup>

<sup>1</sup> Biomass New Materials Research Center, College of Architectural Engineering, Yunnan Agricultural University, Kunming 650201, China

<sup>2</sup> The Key Laboratory for Crop Production and Smart Agriculture of Yunnan Province, Yunnan Agricultural University, Kunming 650201, China

<sup>3</sup> College of Science, Yunnan Agricultural University, Kunming 650201, China

<sup>4</sup> Institute of R&D and application demonstration for key technologies of digital agriculture of Yunnan plateau characteristics, Yunnan Agricultural University, Kunming 650201, China

\* E-mail: [junjiehe@ynau.edu.cn](mailto:junjiehe@ynau.edu.cn) (Junjie He); [Li\\_jing69@ynau.edu.cn](mailto:Li_jing69@ynau.edu.cn) (Jing Li) ;

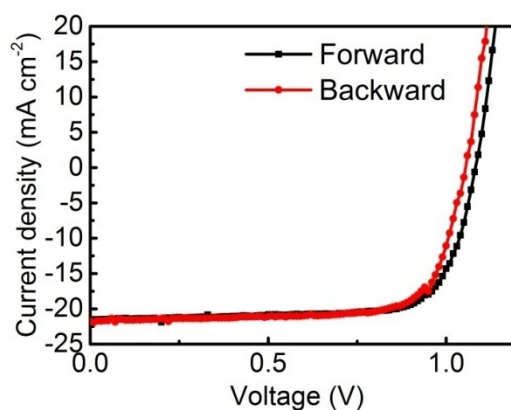

Figure S 1 DMSO/A=2.0 anti-solvent method.

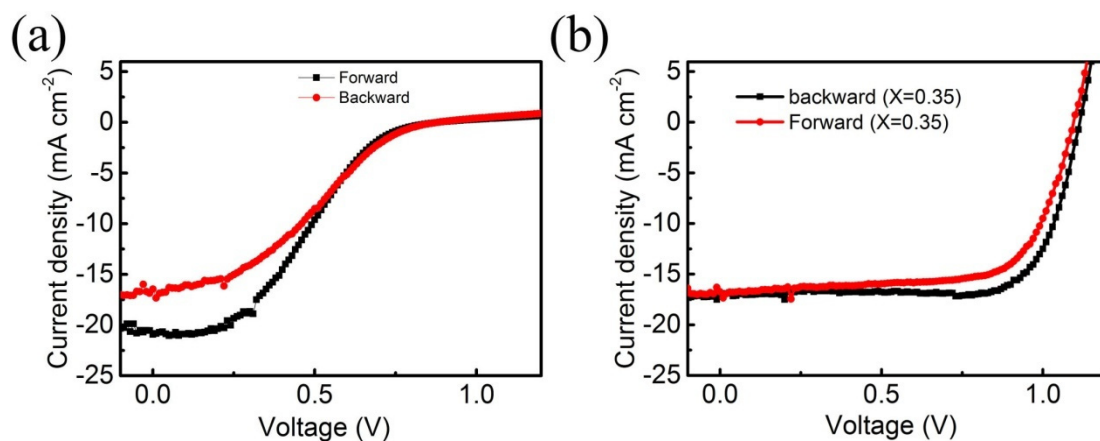

Figure S2 NMP/A = 1.4 (a) and 0.35 (b).

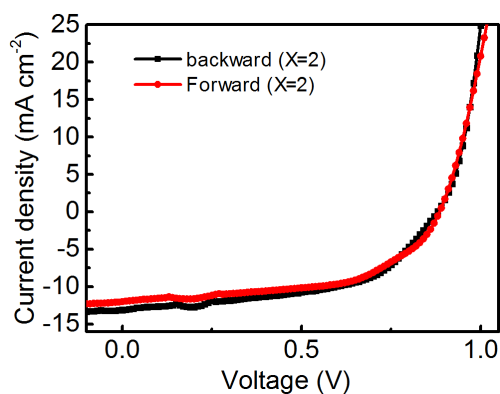

Figure S3 *J-V* curve of p-i-n device with  $\text{Cs}_{0.5}\text{MA}_{0.95}\text{PbI}_3$  perovskite, which was prepared from precursor solution containing 2.0 molar equivalent of NMP to A cations.

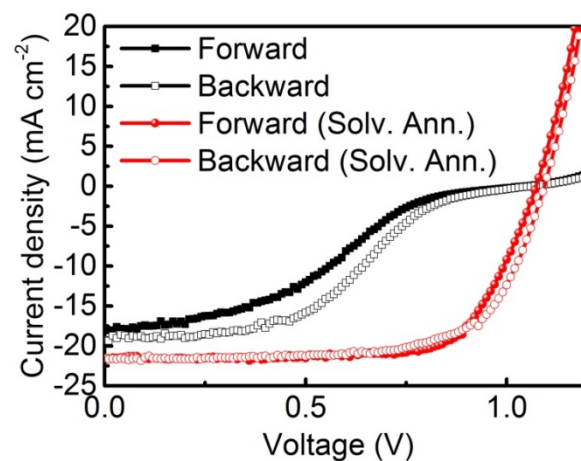

Figure S4 DMSO solvent post annealing can eliminate the weak S-shape.

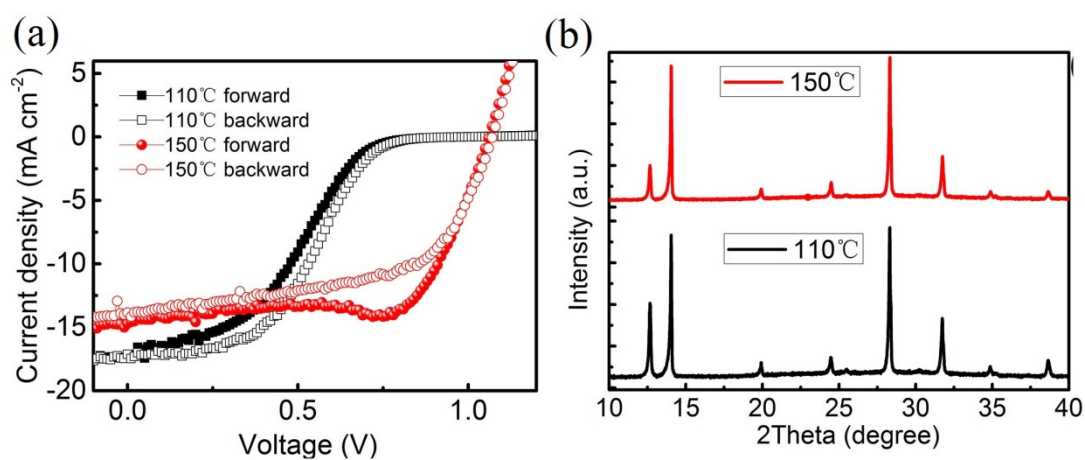

Figure S5 (a) X-ray diffractograms of  $\text{Cs}_{0.05}(\text{FA}_{0.85}\text{MA}_{0.15})_{0.95}\text{Pb}(\text{I}_{0.85}\text{Br}_{0.15})_3$  perovskite layers annealed at 110 and 150 °C. (b)  $J$ - $V$  curves of solar cells with perovskite layers obtained under different annealing temperature. Here the NMP/A molar ratio in the precursor solution is 1.0.

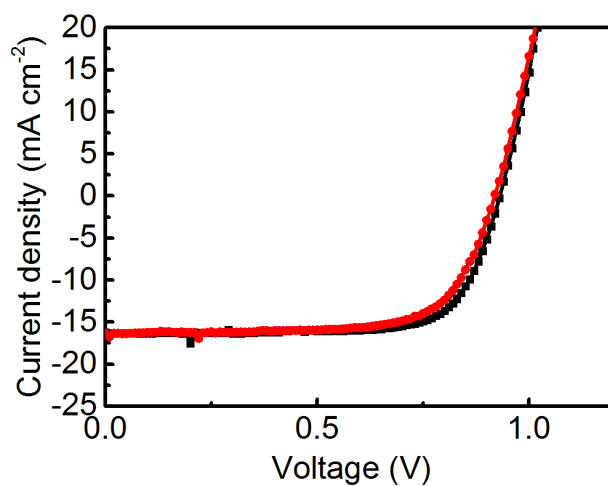

Figure S6  $J$ - $V$  curves of devices prepared with ultra dry lead halides (DMSO/A = 0.7, thiourea / A = 0.1).

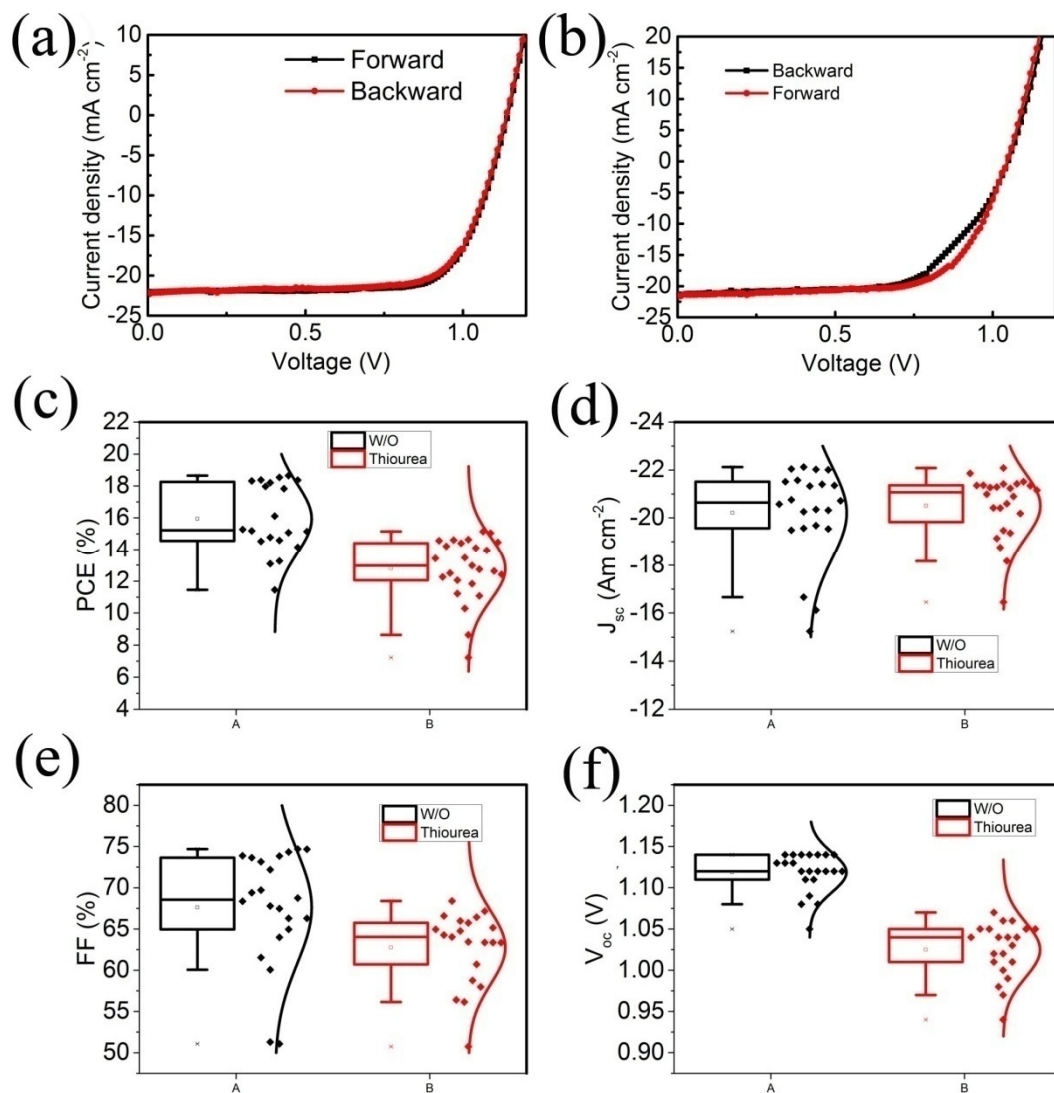

Figure S7 (a) Non ultra dry Pb source. 0.7 DMSO without thiourea. (b) Non ultra dry Pb source. 0.7 DMSO with thiourea (molar ratio = 0.06). (c) ~ (f) the historical results of two groups of devices.

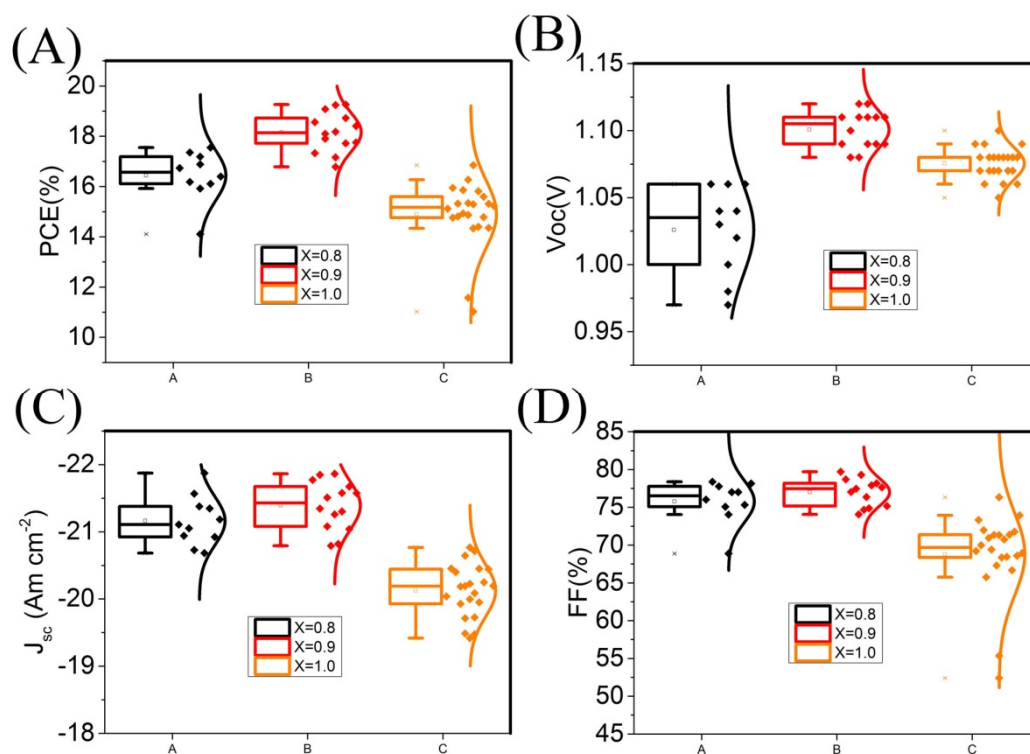

Figure S8 Historical results for the devices prepared from another bottle of non-ultra dry  $\text{PbI}_2$  opened in the glove box. X is the molar ratio between DMSO and A cation and no thiourea was used.

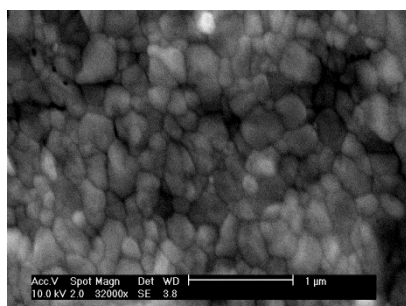

Figure S9 The SEM images of the perovskite layers from non-ultra dry  $\text{PbI}_2$  using DMSO as LBM ( $X=0.9$ ).

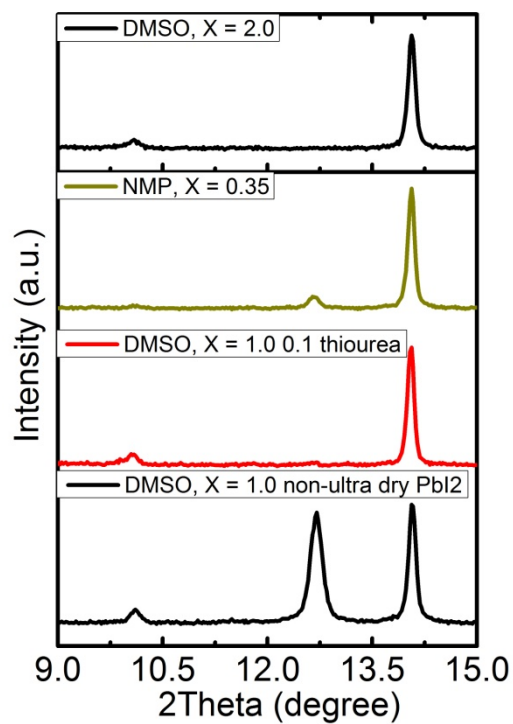

Figure S10 X-ray diffractograms of  $\text{Cs}_{0.05}(\text{FA}_{0.85}\text{MA}_{0.15})_{0.95}\text{Pb}(\text{I}_{0.85}\text{Br}_{0.15})_3$  perovskite layers.

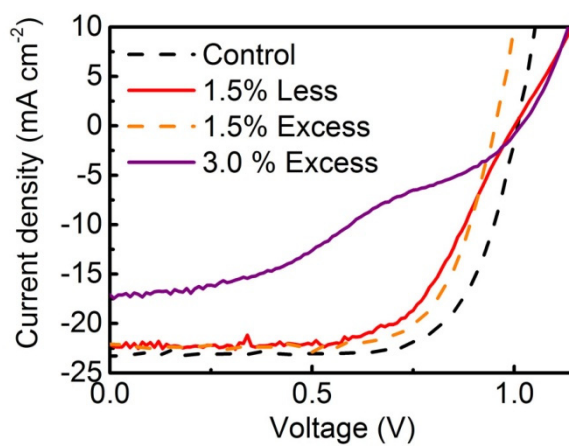

Figure S11  $J$ - $V$  curves of control device, and devices based on perovskite with -1.5~3.0% more  $\text{PbI}_2$  than the control composition.

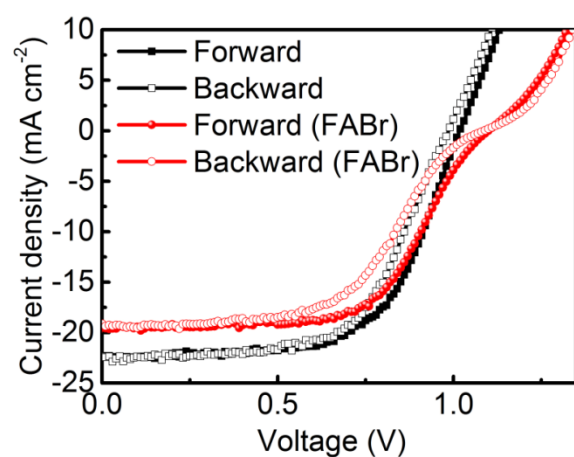

Figure S12 FA salt isopropanol solution post treatment the perovskite layer to introduced more FA salts.

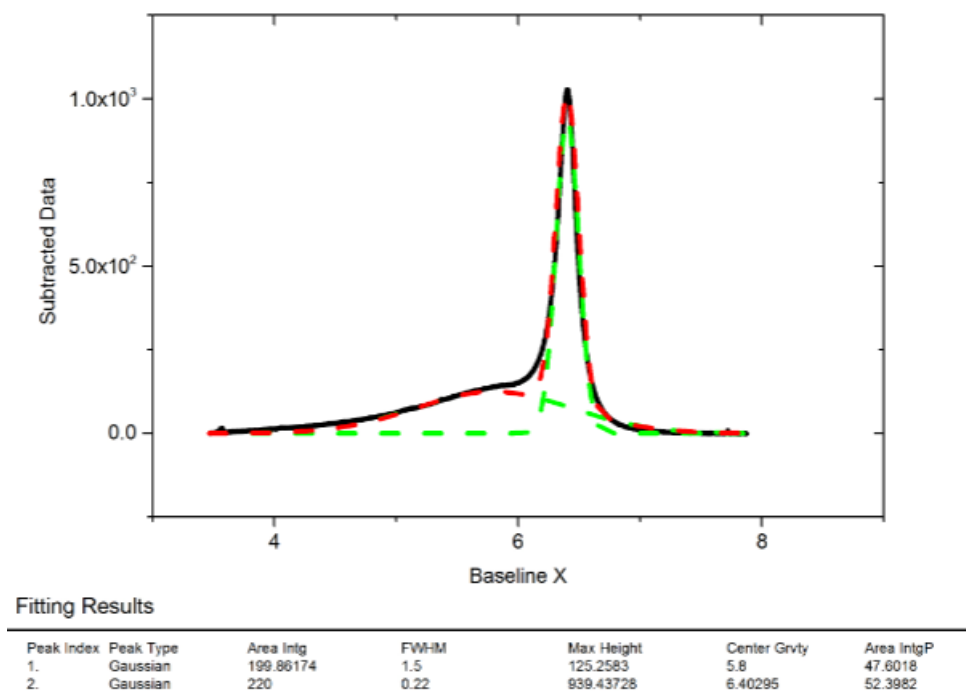

Figure S13 normalized  $^1\text{H}$  NMR spectra of MAI and thiourea.

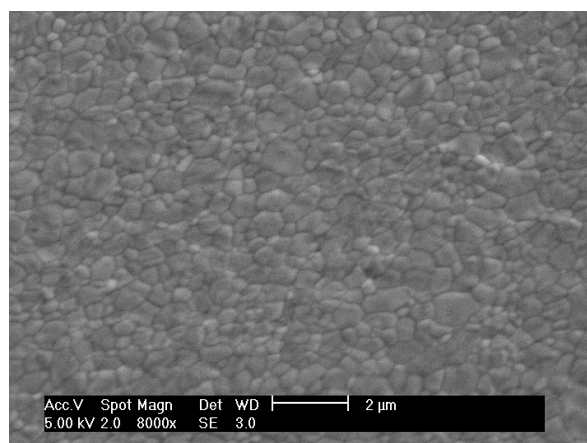

Figure S14 SEM of perovskite layer from Anti-solvent technology, where DMSO was used as LBS and 0.06 molar ratio of thiourea was used. Toluene is the anti-solvent here.

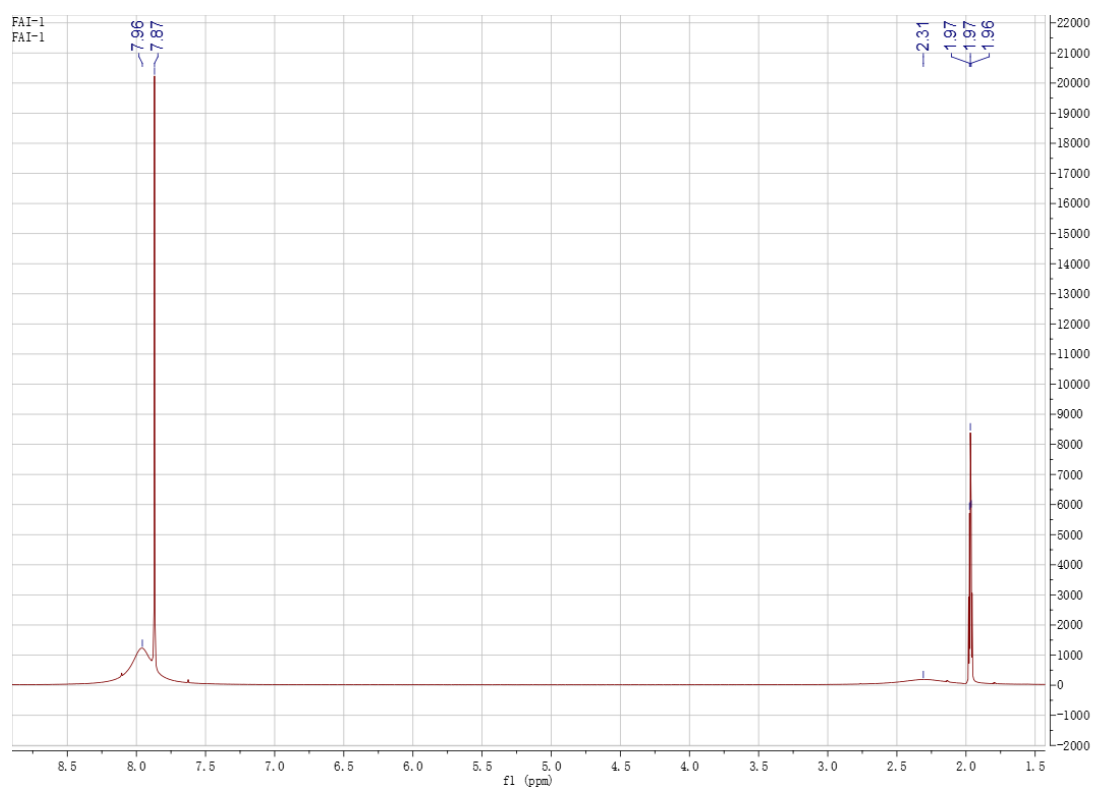

Figure S15 The  $^1\text{H}$  NMR of pure FAI in acetonitrile- $\text{D}_3$ .

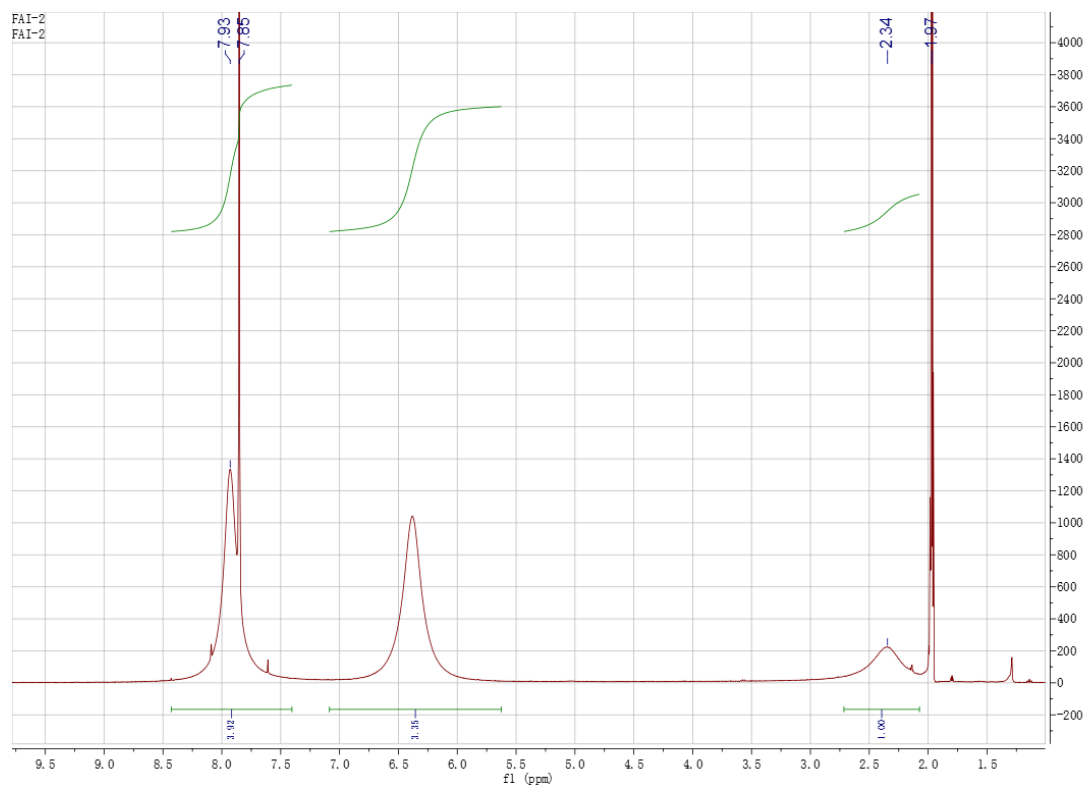

Figure S16 The  $^1\text{H}$  NMR of FAI with equivalent thiourea in acetonitrile- $\text{D}_3$ .

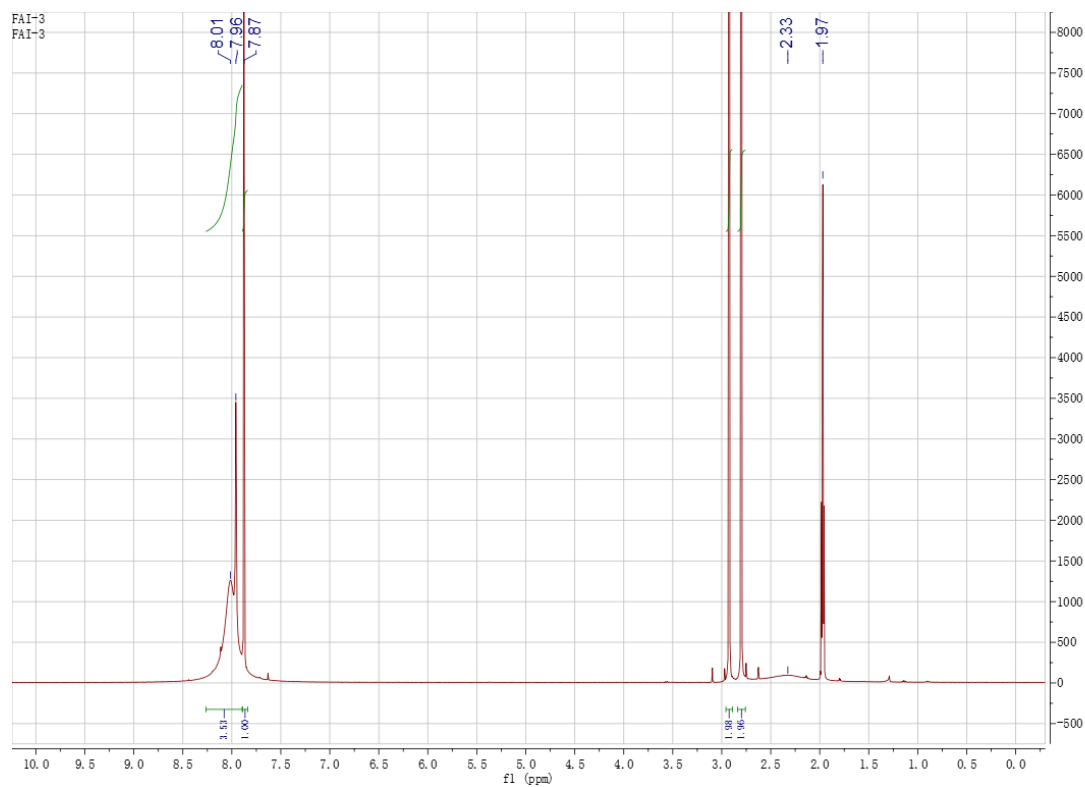

Figure S17 The  $^1\text{H}$  NMR of FAI with equivalent DMF in acetonitrile- $\text{D}_3$ .

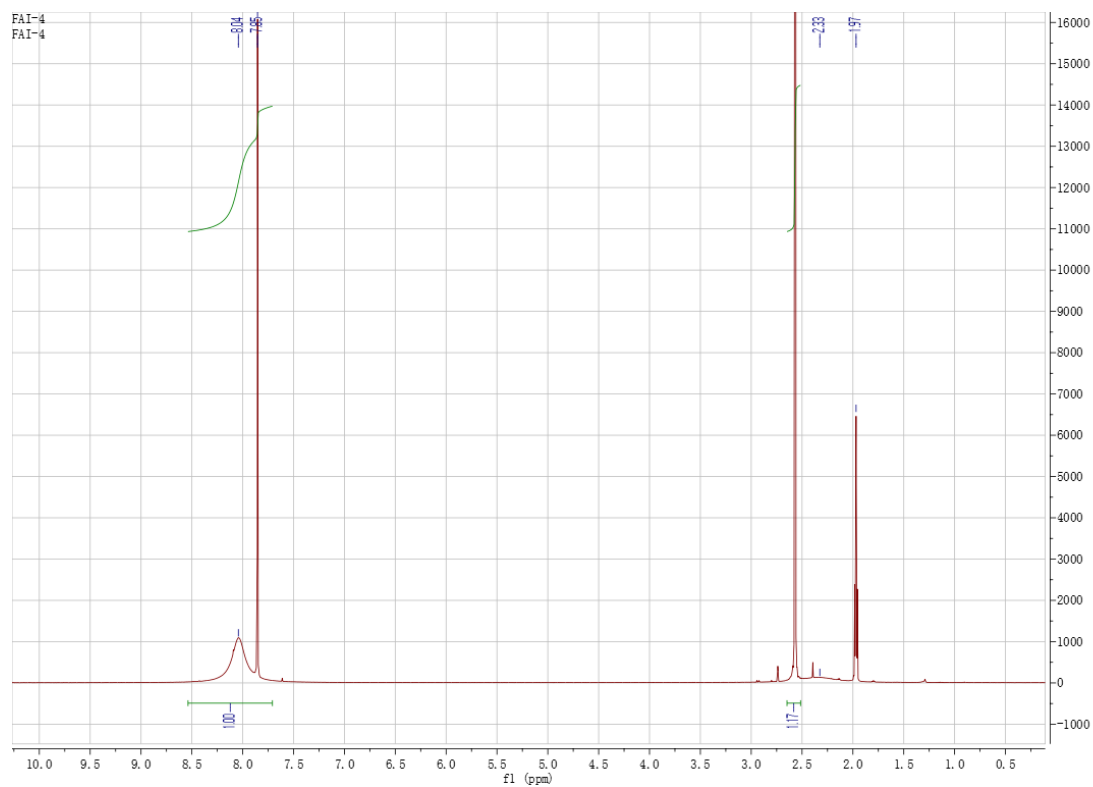

Figure S18 The  $^1\text{H}$  NMR of FAI with equivalent DMSO in acetonitrile- $\text{D}_3$ .

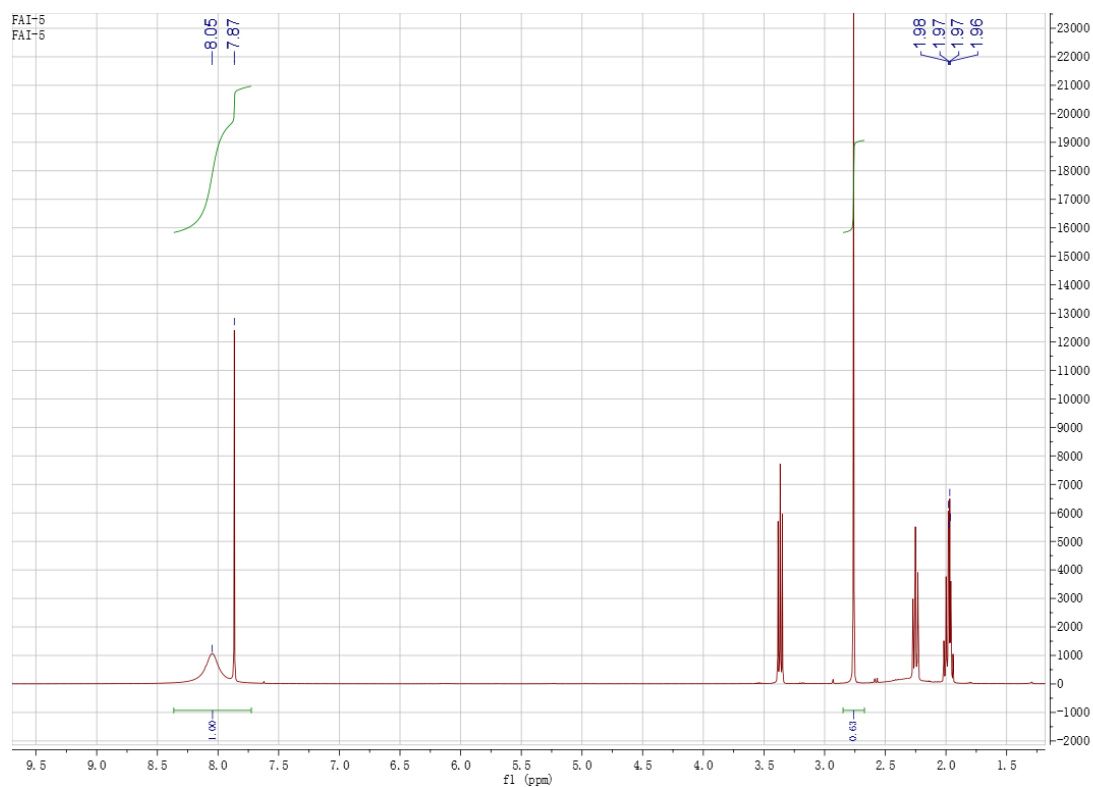

Figure S19 The  $^1\text{H}$  NMR of FAI with equivalent NMP in acetonitrile- $\text{D}_3$ .

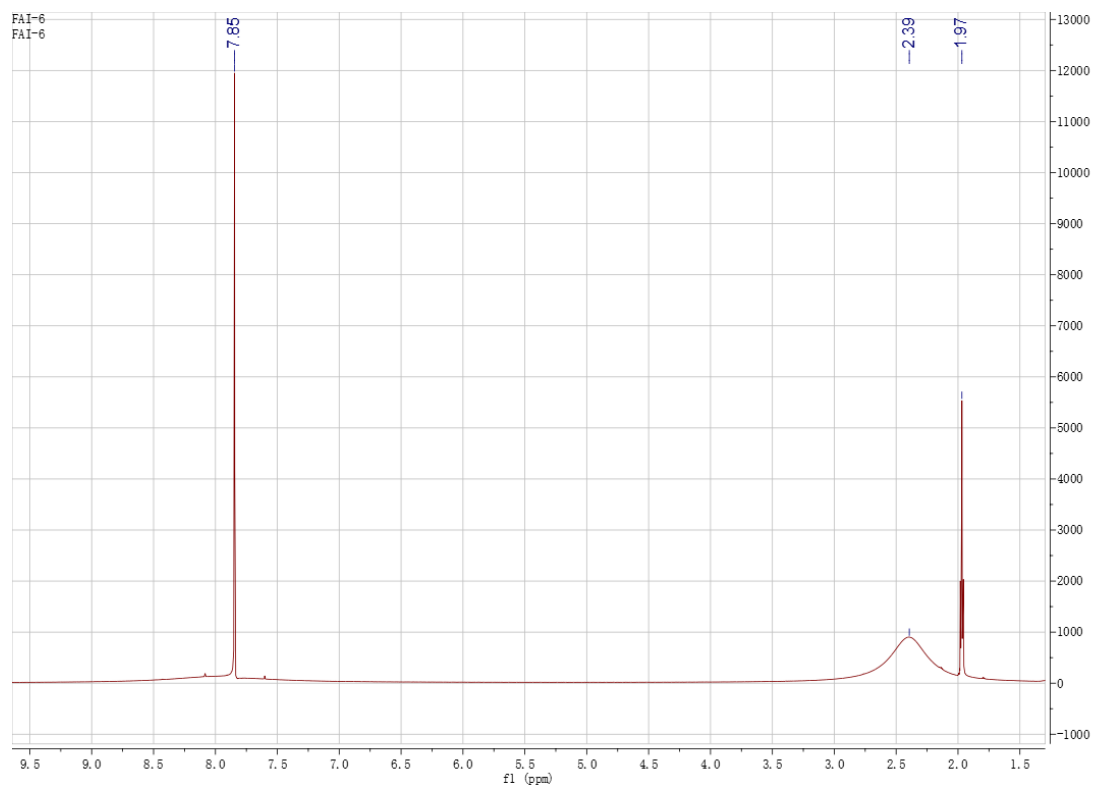

Figure S20 The  $^1\text{H}$  NMR of FAI with  $\text{H}_2\text{O}$  in  $\text{acetonitrile-}D_3$ .

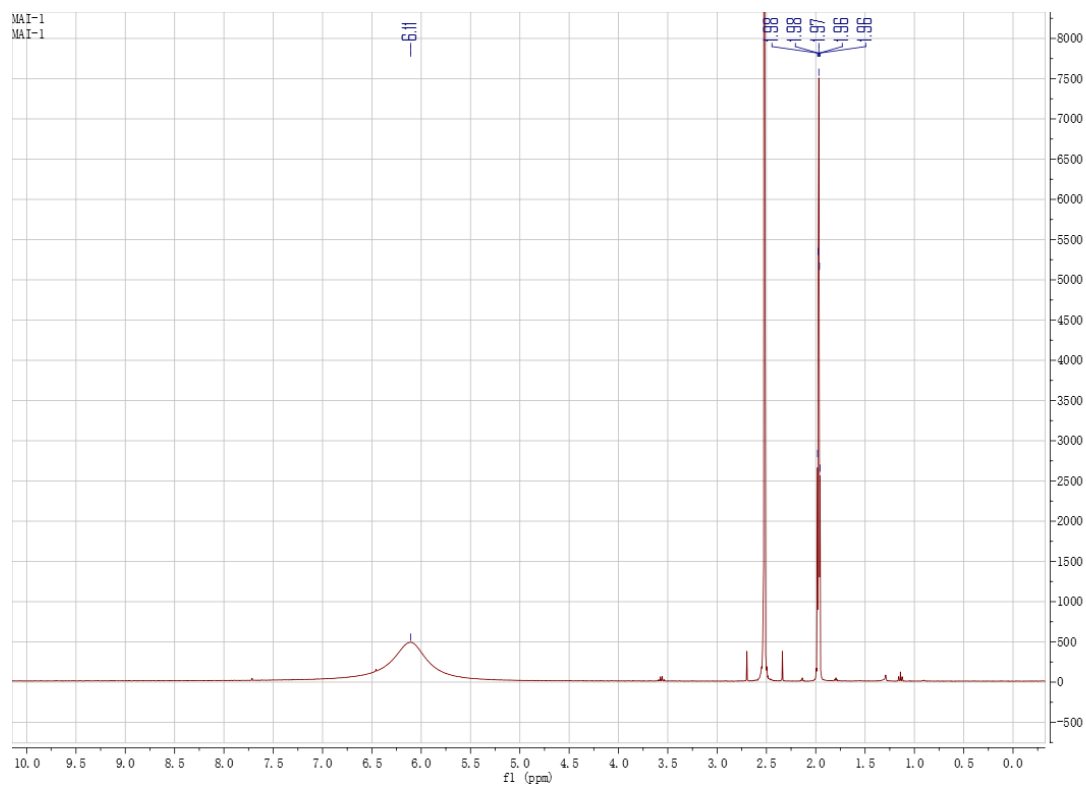

Figure S21 The  $^1\text{H}$  NMR of pure MAI in  $\text{acetonitrile-}D_3$ .

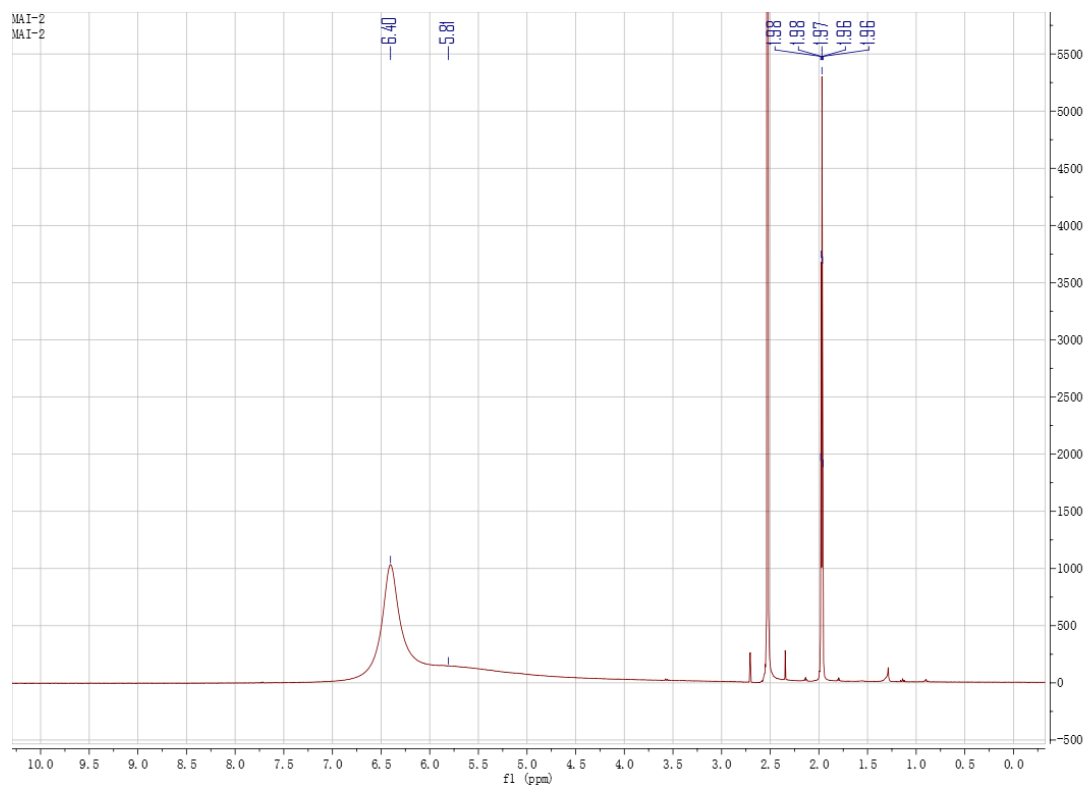

Figure S22 The  $^1\text{H}$  NMR of MAI with equivalent thiourea in acetonitrile- $\text{D}_3$ .

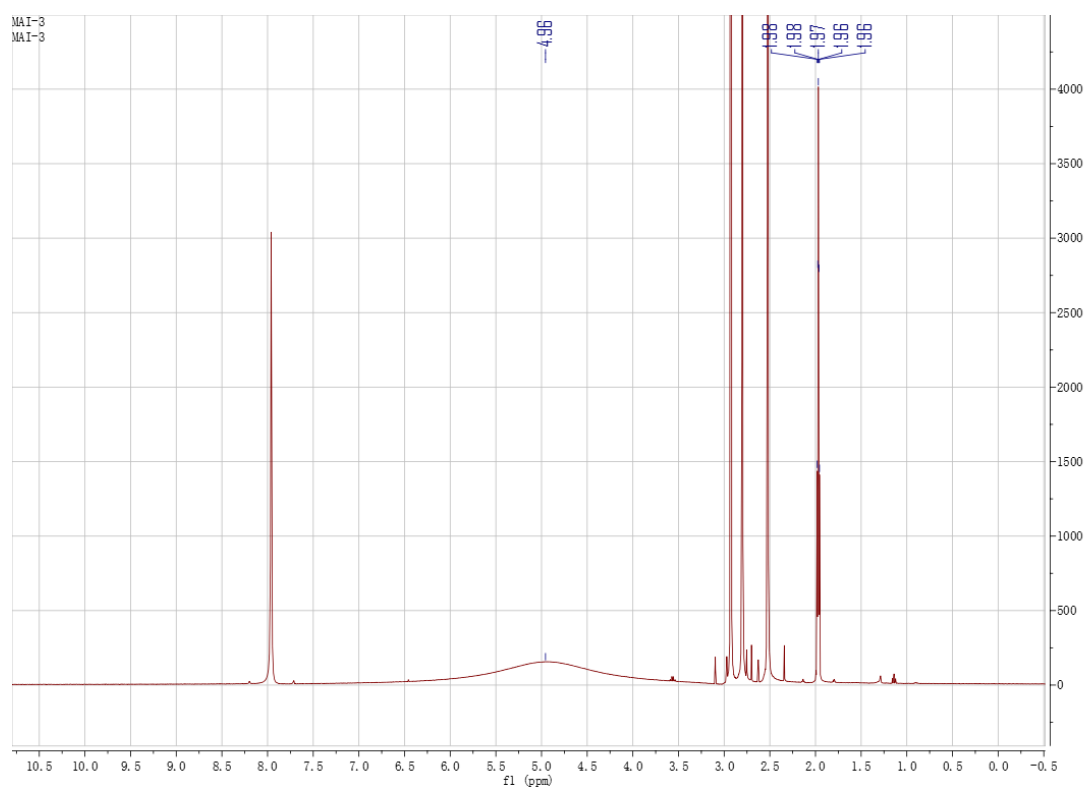

Figure S23 The  $^1\text{H}$  NMR of MAI with equivalent DMF in acetonitrile- $\text{D}_3$ .

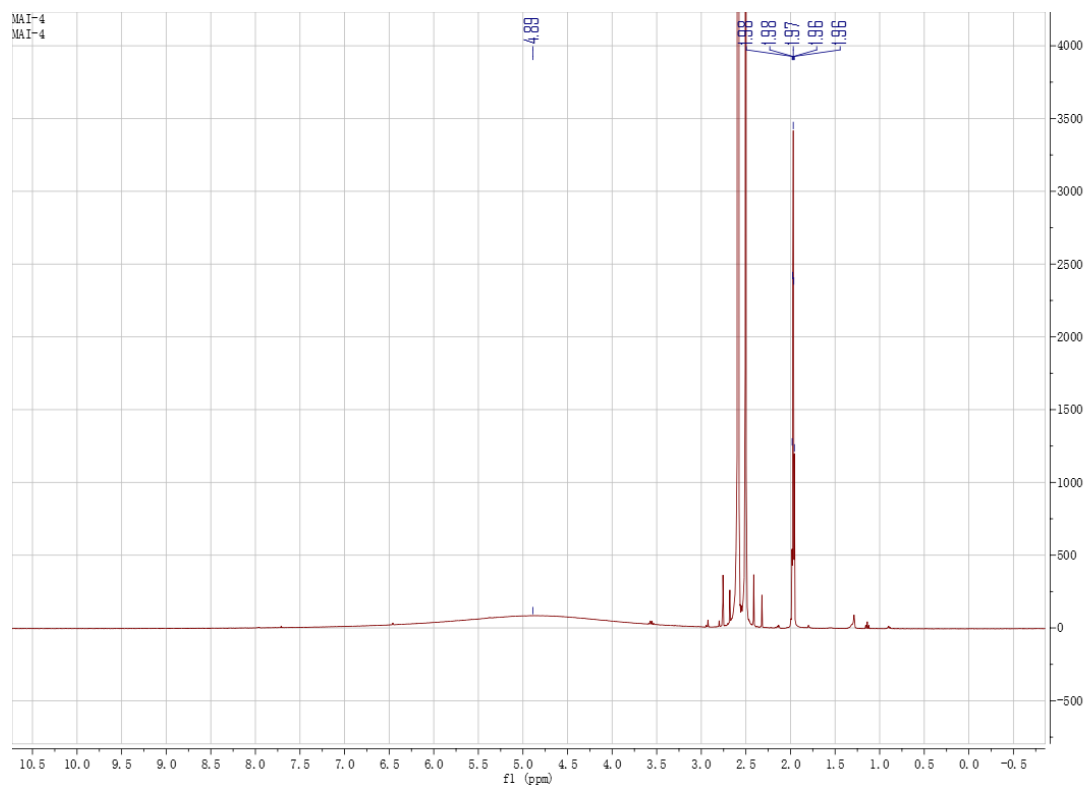

Figure S24 The  $^1\text{H}$  NMR of MAI with equivalent DMSO in acetonitrile- $\text{D}_3$ .

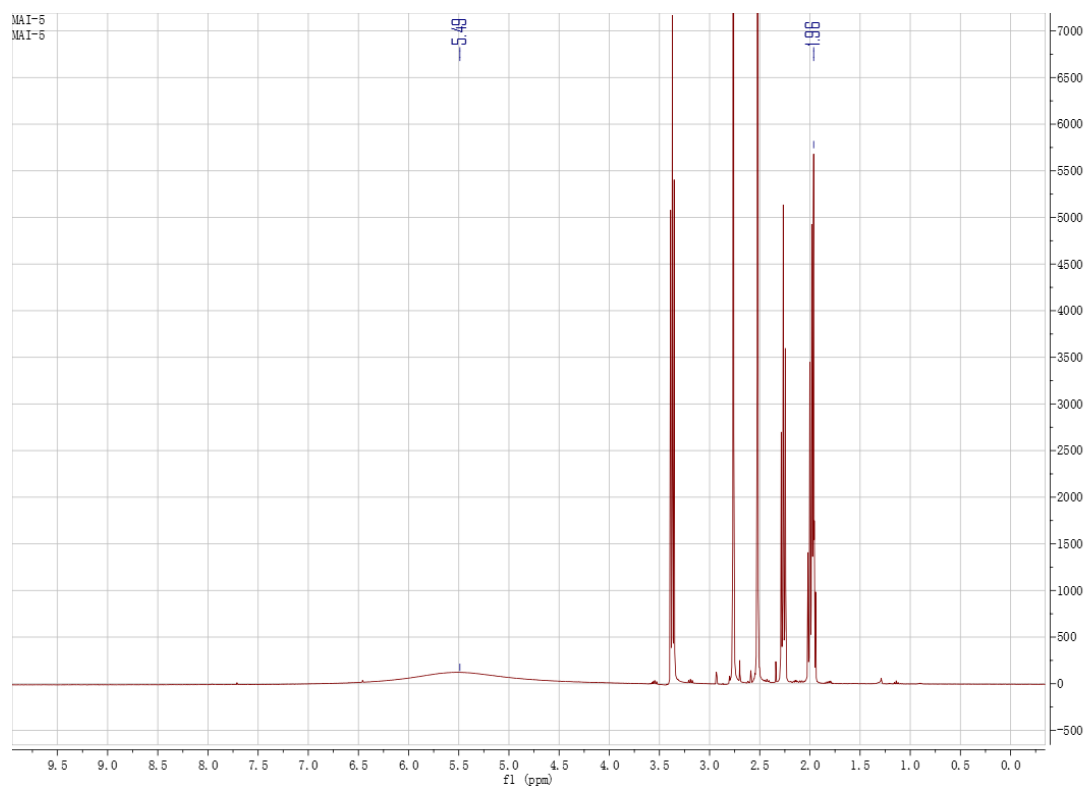

Figure S25 The  $^1\text{H}$  NMR of MAI with equivalent NMP in acetonitrile- $\text{D}_3$ .

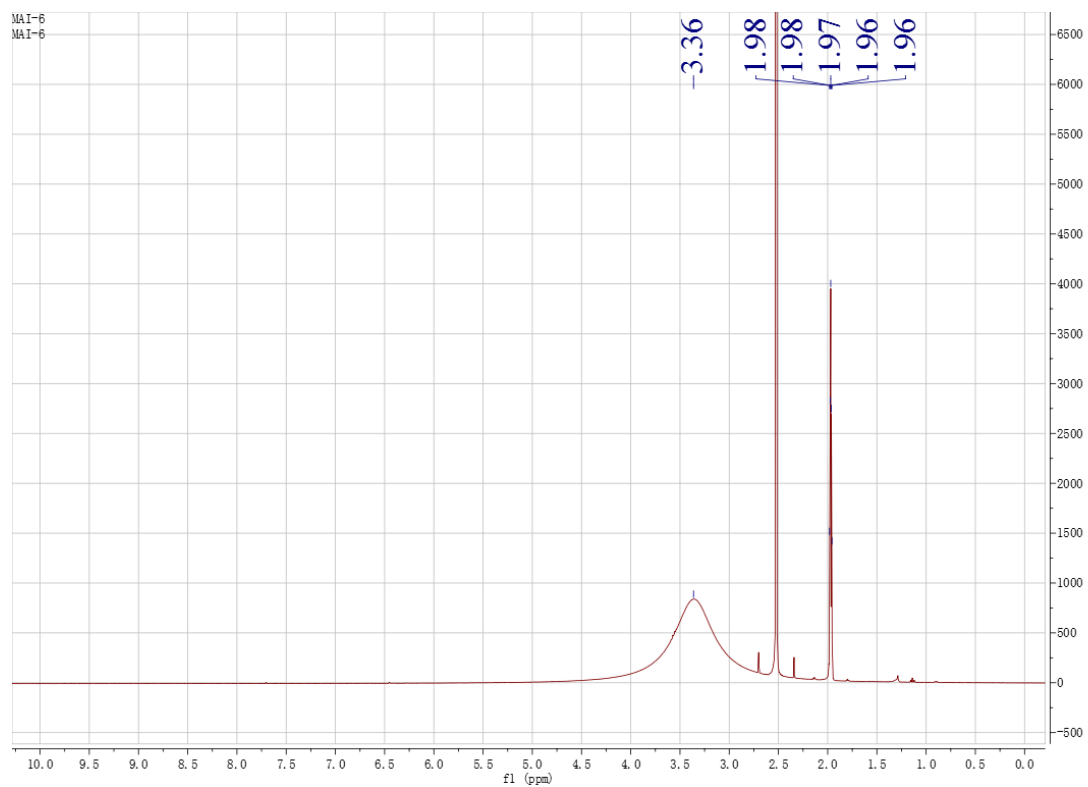

Figure S26 The  $^1\text{H}$  NMR of MAI with equivalent  $\text{H}_2\text{O}$  in  $\text{acetonitrile-}D_3$ .
